# Supplementary material for: Multiwavelength hot-band excited triplet–triplet annihilation upconversion with Pt(ii)porphyrin complex/9,10-bis(phenylethynyl)anthracene and multiple encryption information applications
Source: Royal Society of Chemistry journal article supplement (doi:10.1039/d2tc04133b), 2023-01-01
Supplement: d2tc04133b1.pdf [file d2tc04133b1.pdf]

Electronic Supplementary Information (ESI):

## **Multiwavelength hot-band excited triplet-triplet annihilation upconversion with Pt(II)porphyrin complexes/ 9,10-diphenylanthracene and multiple encrypted information application**

Quanlun Chen, Changqing Ye,\* Shigang Wan, Shuoran Chen, Zuoqin Liang, Lin Li, Yizhong Shi, Xiaomei Wang\*

*Suzhou Key Laboratory of New Energy Materials and Low-carbon Technology, School of Materials Science and Engineering, Suzhou University of Science and Technology, Suzhou, 215009, China*

\* Corresponding authors: [yechangqing@mail.usts.edu.cn](mailto:yechangqing@mail.usts.edu.cn), [wangxiaomei@mail.usts.edu.cn](mailto:wangxiaomei@mail.usts.edu.cn)

### **1. Measurements.**

Absorption and emission spectra were measured with a Hitachi U-3500 spectrophotometer and FLS920 Edinburgh fluorophotometer, respectively. Time-resolved phosphorescence decay was measured under detection of  $\mu\text{F}$  lamp to obtain the lifetime ( $\tau_p$ ) with monoexponential fit give acceptable statistics parameters of  $\chi^2 < 1.1$  ( $\chi^2$  is the “reduced chi-square”).

Under excitation of the diode solid state laser (635 nm, 655 nm, 671 nm or 785nm), the upconversion spectra were recorded with PR655 Spectra Scan colorimeter. The SEM image was taken on the Hitachi Regulus8100. The particle size distribution plot was measured on the Zetasizer Nano ZS. The XRD patterns was measured on the smartlab. I–V curve of TTA-UC powered Si-photodiode was measured on the Keithley 2400.

### **2. Materials.**

Platinum(II)tetraphenyltetrabenzoporphyrin (**PtTPBP**) was purchased from J&K Scientific and 9,10-bis(phenylethynyl)anthracene (**BPEA**) was purchased from Richjoint. Sodium dodecyl sulfate (SDS) was purchased from Aladdin.

The solution containing annihilator/sensitizer (**BPEA/PtTPBP**) pair was prepared in  $\text{CHCl}_3$  or DMF with degassing for about 15 min with  $\text{N}_2$  before UC measurements. The solvent for measurements was commercially available spectral pure.

Slow-rate reprecipitation preparations of **PtTPTBP**-doped **BPEA** crystallites: Under the quick stirring condition, a mixture of solution (20 mL,  $\text{CHCl}_3$ ) containing **PtTPTBP/BPEA** (1/1000, mol/mol) was slowly injected into deionized water (100 mL) in the presence of sodium dodecyl sulfate (SDS, 0.288 g) for about 1.5 hours and then stirred vigorously for another 24 hours. The obtained non-transparent solution is subjected to centrifugation, filtration and dry. The yellow crystallites powders were obtained. Then,

the microcrystals were sealed between two coverslips in a glove box for measurements.

Fast-rate reprecipitation preparations of **PtTPTBP**-doped **BPEA** crystallites: Under the quick stirring condition, a mixture of solution (THF, 20 mL) containing **PtTPTBP/BPEA** (1/1000, mol/mol) was quickly injected into water (100 mL) and then continuously stirred vigorously for 10 mins. The obtained non-transparent solution is subjected to filtration and dry. The yellow crystallites powders were obtained.

**PtTPTBP**-doped **BPEA** crystallites for anti-counterfeiting measurements. Under the quick stirring condition, a mixture of solution (THF, 20 mL) containing **PtTPTBP/BPEA** (1/50000, mol/mol) was quickly injected into water (100 mL) and then continuously stirred vigorously for 10 mins. The obtained non-transparent solution is subjected to filtration and dry. The yellow crystallites powders were obtained.

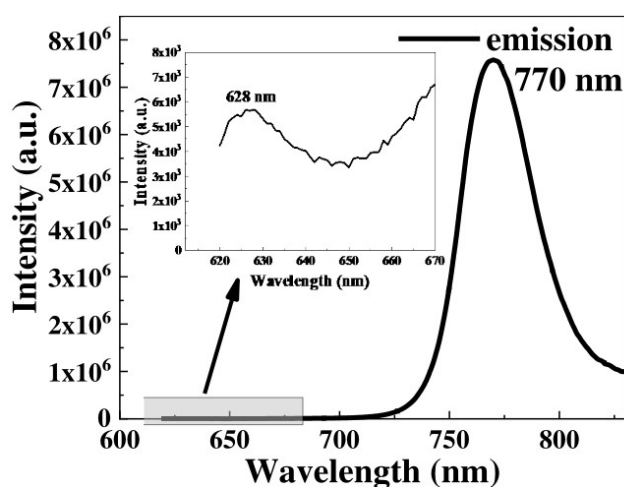

**Fig. S1** The emission spectrum of **PtTPTBP** ( $\text{CHCl}_3$ , 10  $\mu\text{M}$ ), under the excitation of 429 nm in the air (r.t.).

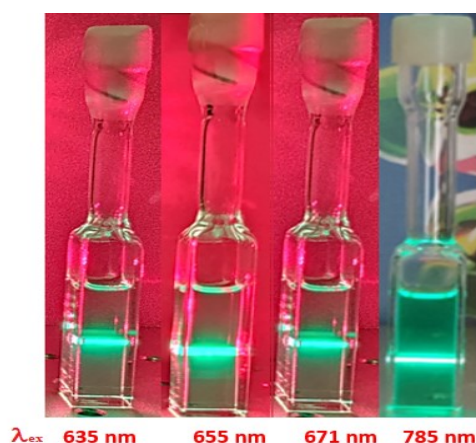

**Fig. S2** Photographs of the upconverted fluorescence of **PtTPTBP/BPEA** (50  $\mu\text{M}$ /0.6 mM) degassing solution ( $\text{CHCl}_3$ ), under excitation of 635 nm (1  $\text{W}\cdot\text{cm}^{-2}$ ) though a notch filter, 655 nm (1.7  $\text{W}\cdot\text{cm}^{-2}$ ) though a notch filter, 671 nm (8.5  $\text{W}\cdot\text{cm}^{-2}$ ) though a 650-short pass filter and 785 nm (8.5  $\text{W}\cdot\text{cm}^{-2}$ ) though a 650-short pass filter, respectively. The upconversion excited by 635 nm is also shown for comparison.

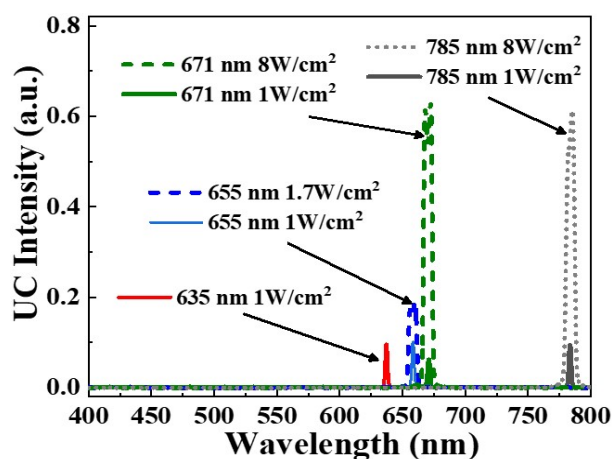

**Fig. S3** Upconversion spectra measurements of BPEA (0.6 mM, degassing CHCl<sub>3</sub>) under the excitation of diode laser with 635 nm (1 W·cm<sup>-2</sup>), 655 nm (1 W·cm<sup>-2</sup>, 1.7 W·cm<sup>-2</sup>), 671 nm (1 W·cm<sup>-2</sup>, 8 W·cm<sup>-2</sup>) and 785 nm (1 W·cm<sup>-2</sup>, 8 W·cm<sup>-2</sup>), respectively.

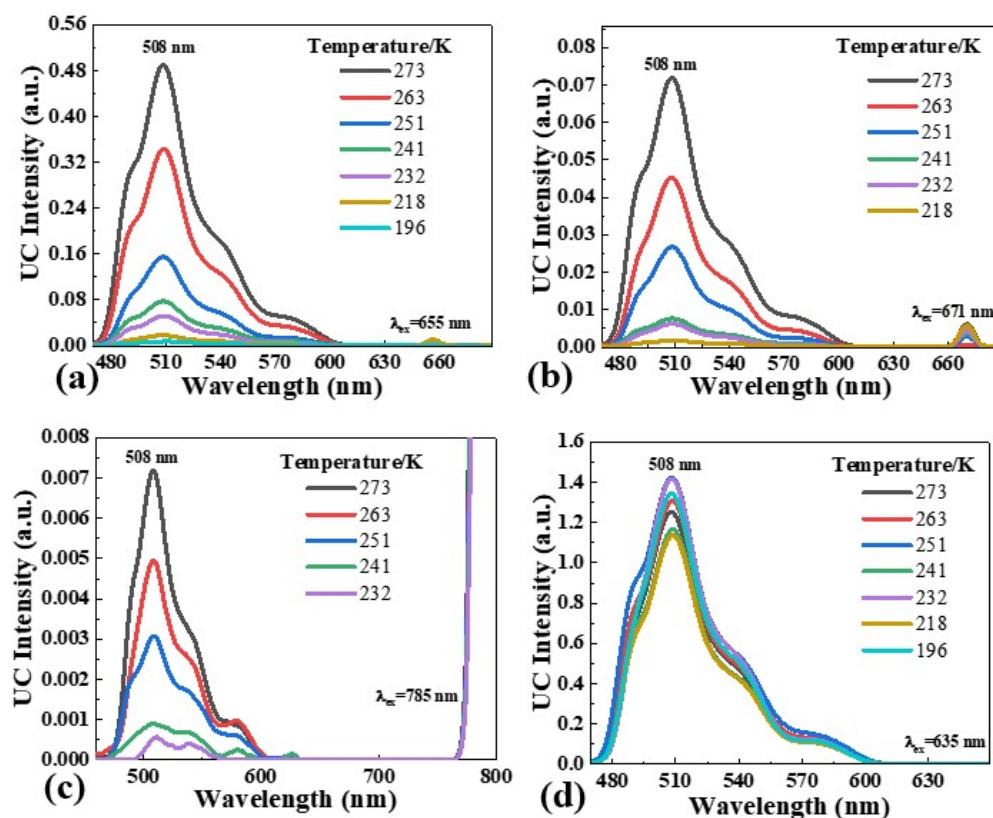

**Fig. S4** Temperature-dependent upconversion spectra of PtTPBP (50 μM)/BPEA (0.6 mM) (in degassing DMF solution) under the excitation of diode laser (1 W·cm<sup>-2</sup>) at 635 nm (a), 655 nm (b), 671 nm (c) and 785 nm (c) with 600-short pass filter.

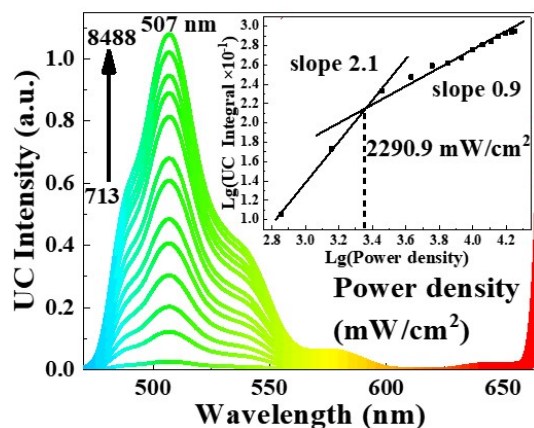

**Fig. S5** Power-dependent upconversion spectra of PtTPBP/BPEA (50  $\mu$ M /0.6 mM) in degassing  $\text{CHCl}_3$  under excitation of 671 nm through a 650-short pass filter.

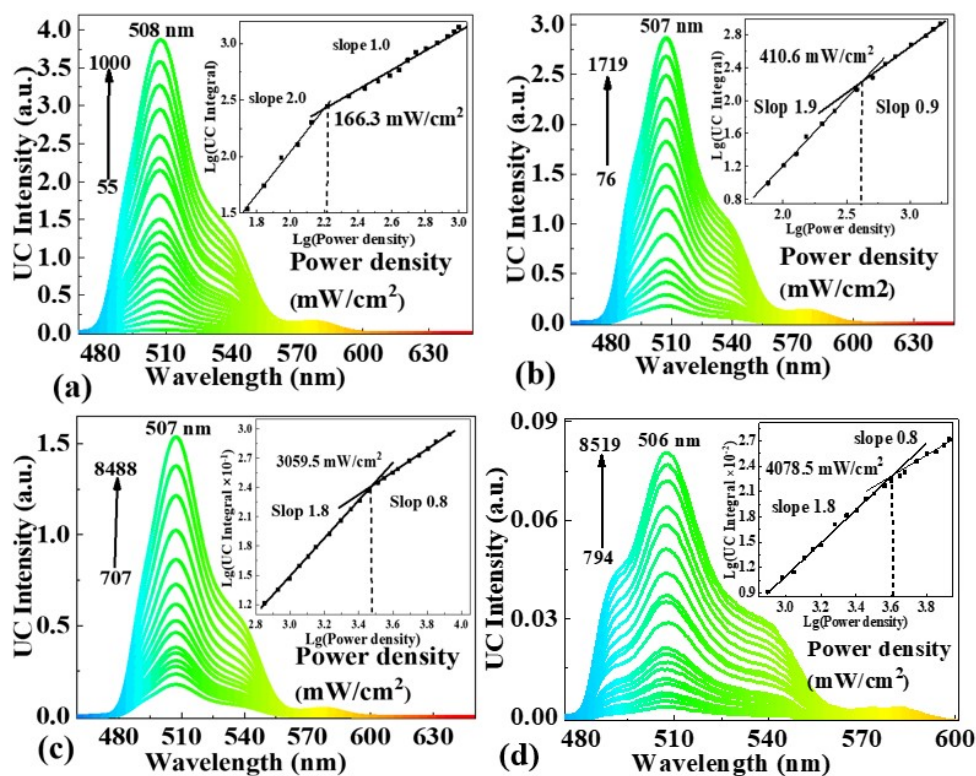

**Fig. S6** Power-dependent upconversion spectra of PtTPBP/BPEA (50 $\mu$ M/0.6 mM) in degassing DMF, under excitation of 635 nm through a notch filter (a), 655 nm through a notch filter (b) 671 nm through a 650-short pass filter (c) and 785 nm through a 650-short pass filter (d).

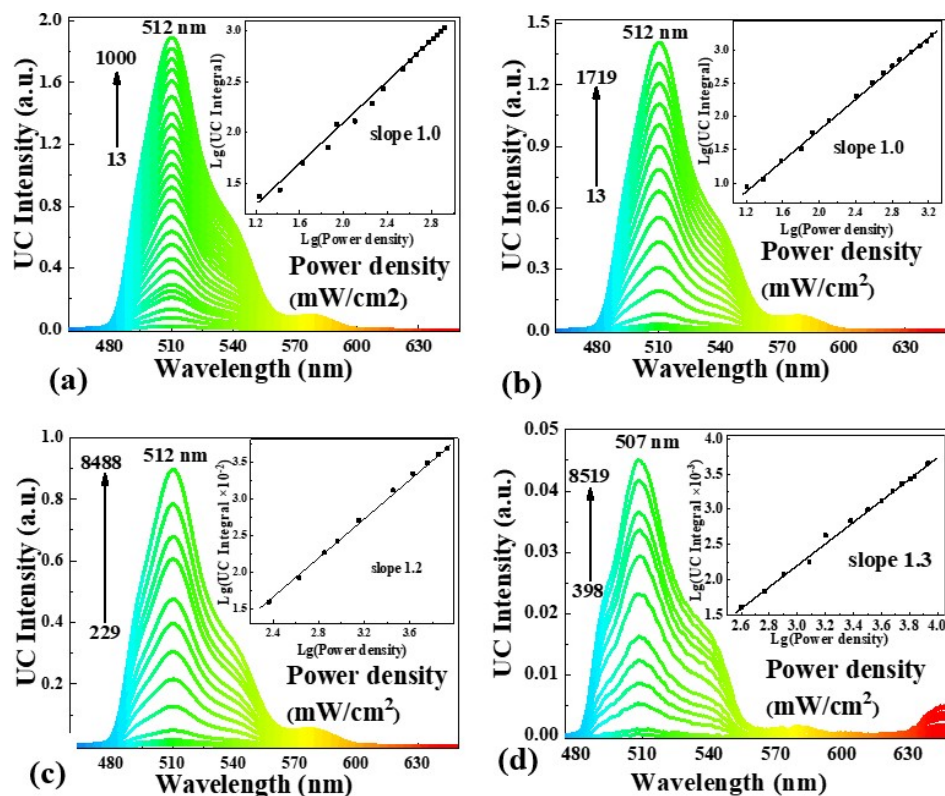

**Fig. S7** Power-dependent upconversion spectra of **PtTPBP/BPEA** ( $50 \mu\text{M}/0.6 \text{ mM}$ ) in degassing DMSO under excitation of 635 nm through a notch filter (a), 655 nm through a notch filter (b) 671 nm through a 650-short pass filter (c) and 785 nm through a 650-short pass filter (d). The slope changing from  $\sim 2$  to  $\sim 1$  cannot be observed here, due to weak TTA-UC in DMSO solution.

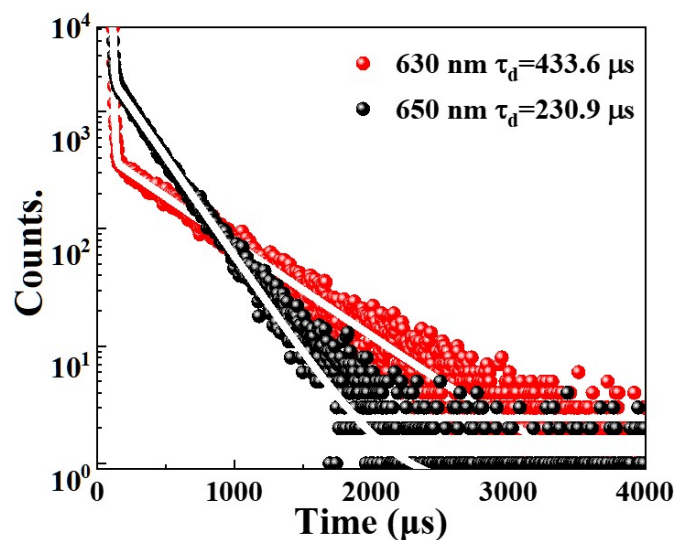

**Fig. S8** Delay fluorescence curves of **BPEA** ( $0.6 \text{ mM}$ ) combined with **PtTPBP** ( $50 \mu\text{M}$ ) under a pulsed excitation at 630 nm (red) and 650 nm (black) (detection at 508 nm, degassing DMF). Due to the weak upconversion emission, the delay fluorescence curves of **BPEA** cannot be obtained under a pulsed excitation at 676 nm and 785 nm.

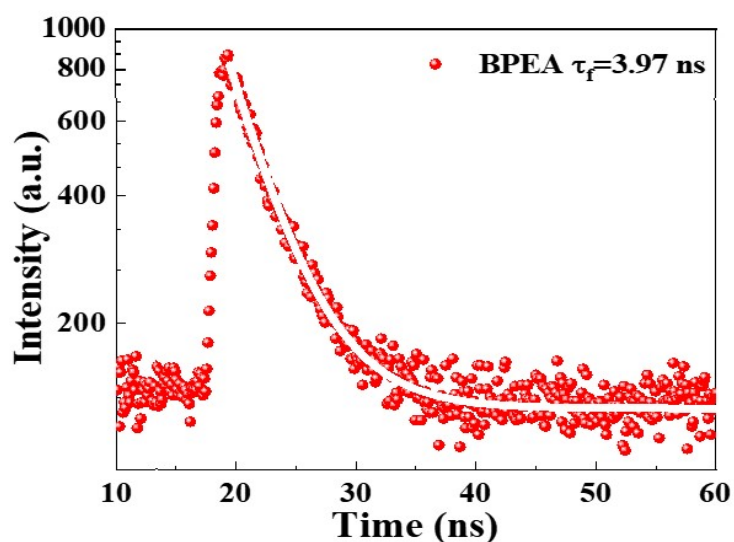

**Fig. S9** Time-resolved fluorescence decay curve of BPEA (10  $\mu\text{M}$ ) under a pulsed excitation at 438 nm (detection at 504 nm, DMF).

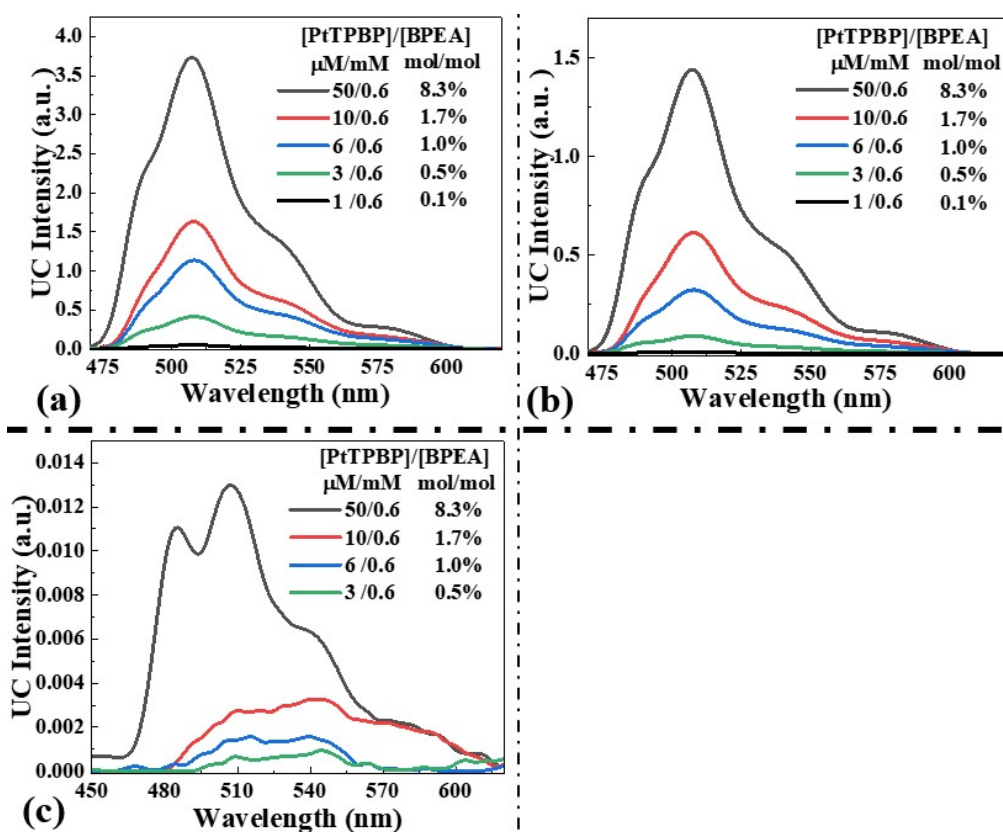

**Fig. S10** TTA-UC spectra of BPEA (the concentration fixed at 0.6 mM) combined with PtTPBP (concentration: 1  $\mu\text{M}$  ~50  $\mu\text{M}$ ), under the excitation of 635 nm (a), 655 nm (b) and 785 nm (c) at power density of 1  $\text{W}\cdot\text{cm}^{-2}$  (with 600-short pass filter).

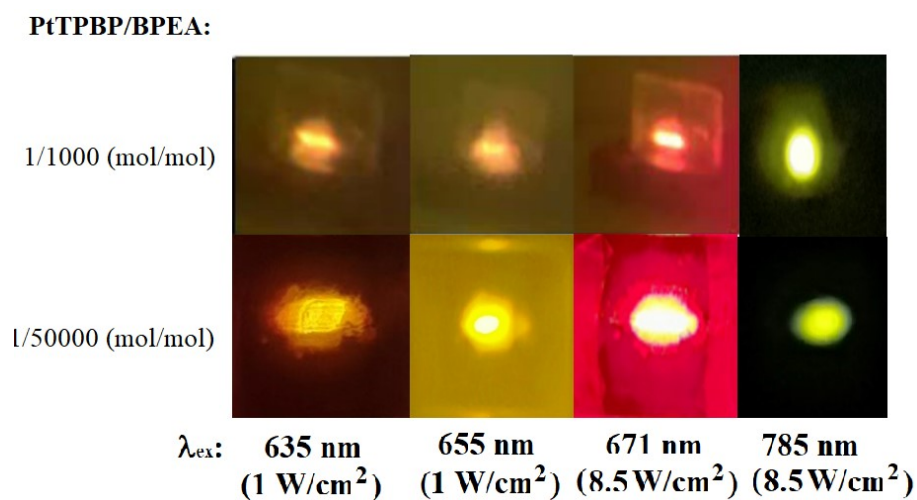

**Fig. S11** Photographs of the upconverted fluorescence in solid **BPEA** crystallites doped **PtTPBP** as molar ratio of 1000/1 (up) and 50000/1 (down), under excitation of 635 nm (1 W·cm<sup>-2</sup>) through a notch filter, 655 nm (1.7 W·cm<sup>-2</sup>) through a notch filter, 671 nm (8.5 W·cm<sup>-2</sup>) through a 650-short pass filter and 785 nm (8.5 W·cm<sup>-2</sup>) through a 650-short pass filter.

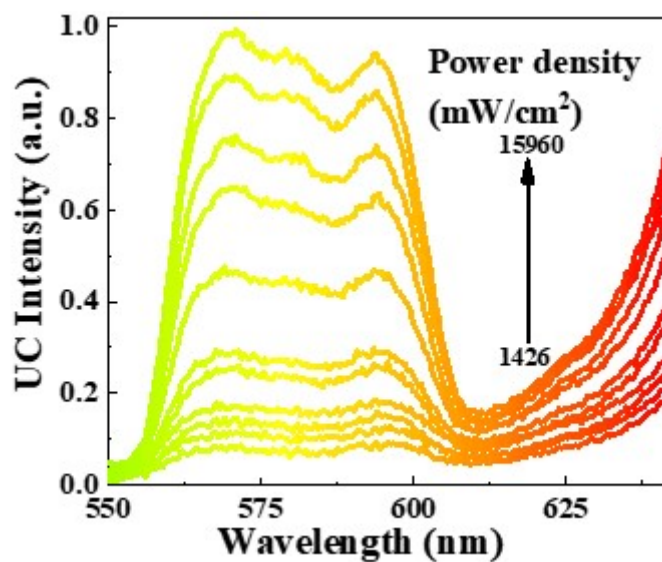

**Fig. S12** power-dependent upconversion spectra **PtTPBP/BPEA** (1/1000, mol/mol) microcrystals under excitation of 671nm through a 650-short pass filter.

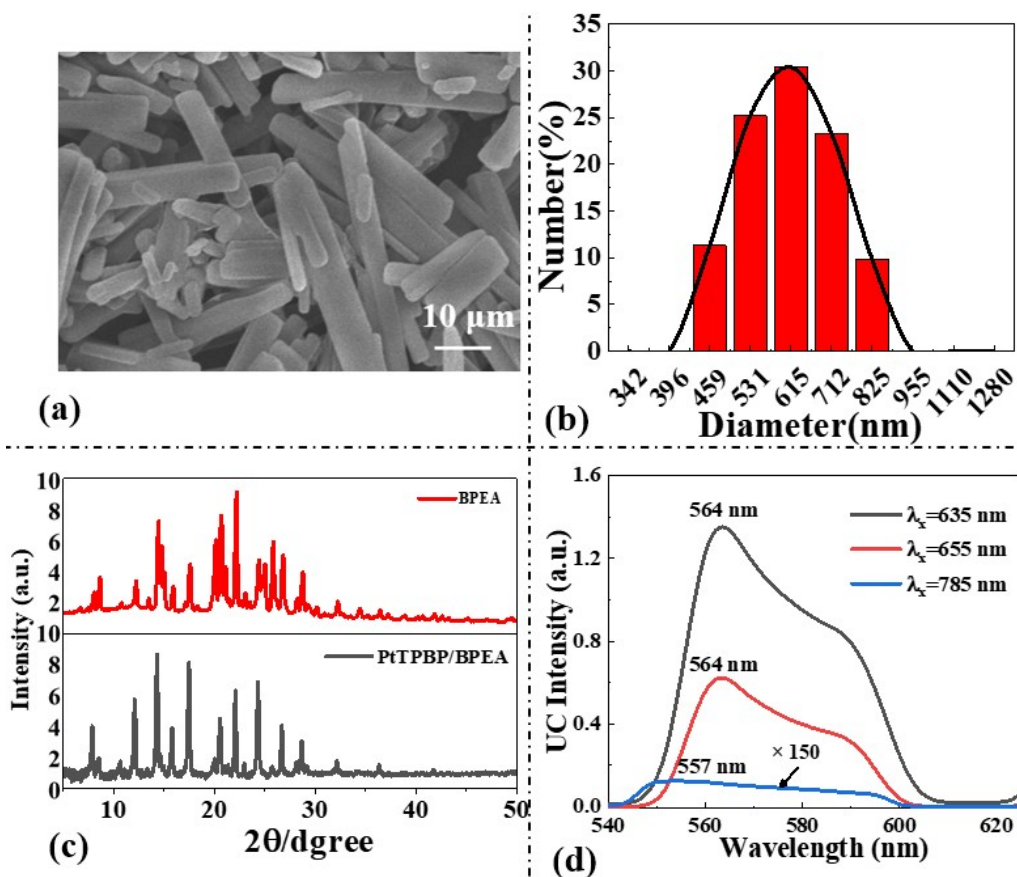

**Fig. S13** PtTPBP/BPEA (1/1000, mol/mol) microcrystals obtained by fast-rate precipitation: SEM image (a), histograms of the size distribution (b), PXRD pattern (BPEA microcrystal presented for comparison) (c), and TTA-UC spectra obtained by exposure to air under 635 nm excitation (with a notch filter), 655 nm excitation (with a notch filter) and 785 nm excitation (with a 650-short pass filter) at the power density at 1 W·cm<sup>-2</sup> (d).



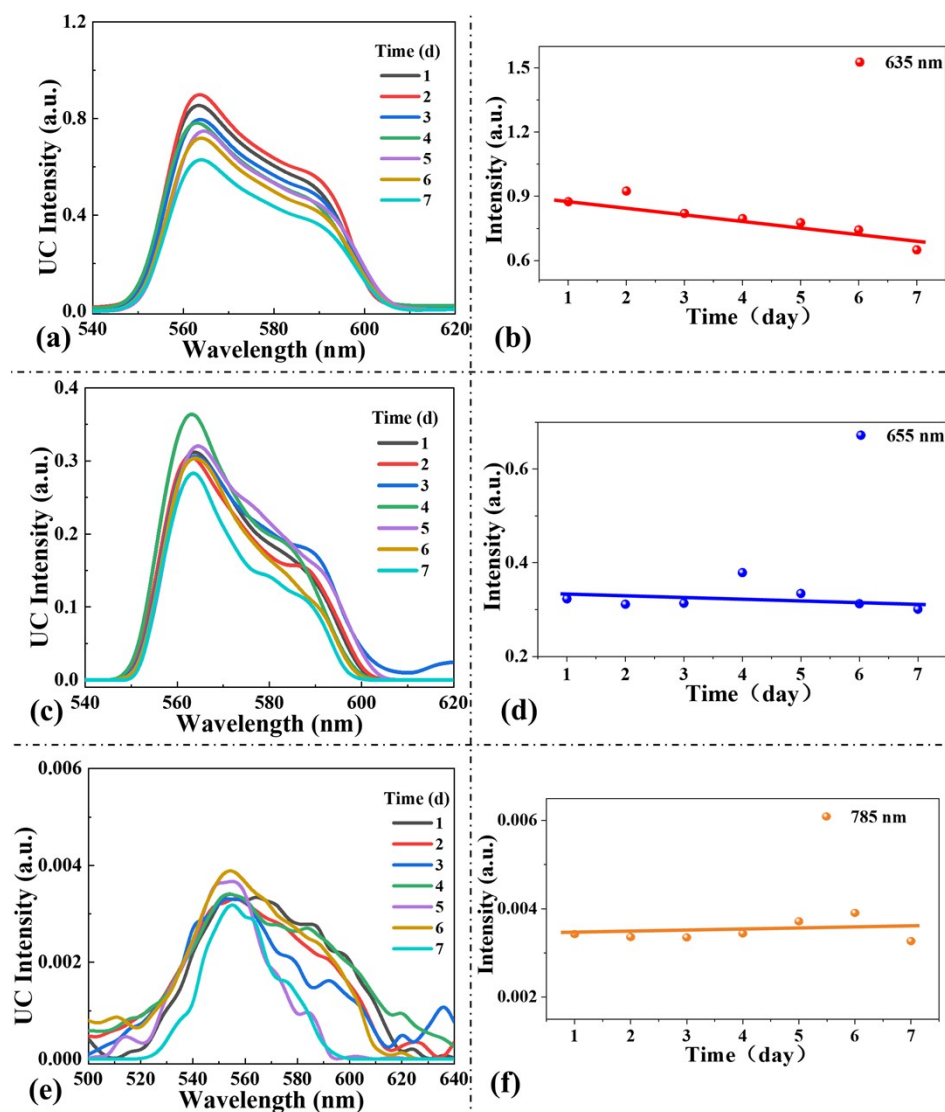

**Fig. S14** Under the air atmosphere, the changes of upconversion spectra and upconversion intensities of **PtTPBP/BPEA** crystallites (1/1000, mol/mol), under excitation of 635 nm ( $1 \text{ W}\cdot\text{cm}^{-2}$ ) through a notch filter (**a, b**), 655 nm ( $1 \text{ W}\cdot\text{cm}^{-2}$ ) through a notch filter (**c, d**) and 785 nm ( $2 \text{ W}\cdot\text{cm}^{-2}$ ) through a 650-short pass filter (**e, f**) from 1<sup>th</sup> day till to 7<sup>th</sup> days.

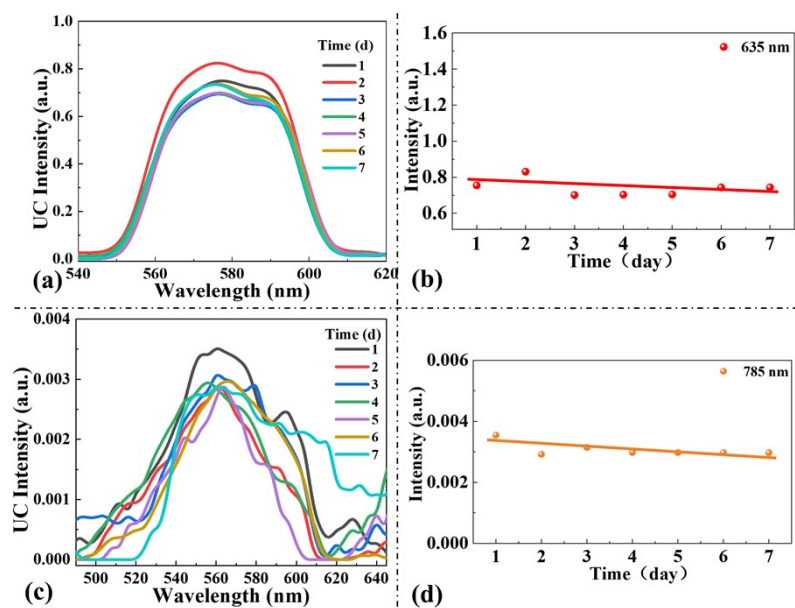

**Fig. S15** Under the air atmosphere, the changes of upconversion spectra and upconversion intensities of **PtTPBP/BPEA** crystallites (1/50000, mol/mol), under excitation of 635 nm (1  $\text{W}\cdot\text{cm}^{-2}$ ) through a notch filter (**a, b**) and 785 nm (2  $\text{W}\cdot\text{cm}^{-2}$ ) through a 650-short pass filter (**c, d**) from 1<sup>th</sup> day till to 7<sup>th</sup> days.
